# Supplementary material for: Predictive model identifies strategies to enhance TSP1-mediated apoptosis signaling
Source: PubMed Central journal article supplement (PMC5735807; doi:10.1186/s12964-017-0207-9), 2017-12-19
Supplement: 12964_2017_207_MOESM2_ESM.pdf [file 12964_2017_207_MOESM2_ESM.pdf]

%% Initial Conditions

```
TSP1 = y(1);
CD36 = y(2);
TSP1_CD36 = y(3);
p59 = y(4);
TSP1_CD36_p59 = y(5);

pro8 = y(6);
casp8 = y(7);
pro3 = y(8);
casp3 = y(9);
p38cyt = y(10);

pp38cyt = y(11);
Ptase_cyt = y(12);
pp38cyt_Ptase = y(13);
pp59_Ptase = y(14);
XIAP = y(15);

PARP = y(16);
casp3_PARP = y(17);
cPARP = y(18);
casp3_u = y(19);
FasL_cyt = y(20);

FasLm_cyt = y(21);
Fas = y(22);
casp3_MEKK1 = y(23);
cMEKK1 = y(24);
MEKK1 = y(25);

cMEKK1_p38cyt = y(26);
FL = y(27);
DISC = y(28);
FasL = y(29);
DISC_pro8 = y(30);

DISC_FL = y(31);
FS = y(32);
DISC_FS = y(33);
p43p41 = y(34);
p43_FLIP = y(35);

DISC_pro8_FS = y(36);
DISC_FL_FL = y(37);
DISC_FL_FS = y(38);
DISC_FS_FS = y(39);
IKK = y(40);

p43_FLIP_IKK_a = y(41);
NFkB_IkB = y(42);
NFkB_IkB_p = y(43);
NFkB_cyt = y(44);
TSP1_CD36_pp59 = y(45);

pp38nuc = y(46);
p38nuc = y(47);
Ptase_nuc = y(48);
pp38nuc_Ptase = y(49);
FasLm_nuc = y(50);

NFkB_nuc = y(51);
pp38_NFkB = y(52);
```

NFkB\_p = y(53);

%% Parameters

Kon\_dephos = params(1,1);

Kdephos = params(2,1);

Ki\_casp3\_XIAP = params(3,1);

Ktrsp\_cyt\_nuc = params(4,1);

Kinter = params(5,1);

Vmax\_FasLm = params(6,1);

Km\_FasLm = params(7,1);

Kexp\_FasLm = params(8,1);

Ksyn\_FasL = params(9,1);

Kexp\_FasL = params(10,1);

Kon\_Fas\_FasL = params(11,1);

Kon\_DISC\_pro8 = params(12,1);

Ksyn\_all = params(13,1);

Kdeg = params(14,1);

Kon\_casp3\_MEKK1 = params(15,1);

Kp\_p38 = params(16,1);

Kc\_MEKK1 = params(17,1);

Kon\_cMEKK1\_p38 = params(18,1);

FasLsyn\_factor = params(19,1);

Kon\_DISC\_FL = params(20,1);

Kon\_DISC\_FS = params(21,1);

Kp43p41 = params(22,1);

Kp43FLIP = params(23,1);

Kon\_DISC2\_FS = params(24,1);

K\_casp8 = params(25,1);

Kc\_casp3 = params(26,1);

Kr\_casp8 = params(27,1);

Ka\_IKK = params(28,1);

Kp\_NFkBikB = params(29,1);

Ka\_NFkB = params(30,1);

Kdeg\_IKKa = params(31,1);

Kdeg\_NFkBcyt = params(32,1);

Kdeg\_casp8 = params(33,1);

Kdeg\_casp3 = params(34,1);

Kon\_pp38\_NFkB = params(35,1);

Kdeg\_pp38cyt = params(36,1);

Kon\_TSP1\_CD36 = params(37,1);

Kon\_TSP1\_CD36\_p59 = params(38,1);

Kp\_p59 = params(39,1);

Kp\_NFkB = params(40,1);

Kon\_casp3\_PARP = params(41,1);

Kc\_PARP = params(42,1);

Ksyn\_Ptase = params(43,1);

Kdeg\_Ptase = params(44,1);

Kc\_casp8 = params(45,1);

Kinser = params(46,1);

koff = params(47,1);

Koff\_dephos = params(48,1);

Koff\_casp3\_MEKK1 = params(49,1);

Koff\_cMEKK1\_p38 = params(50,1);

Koff\_pp38\_NFkB = params(51,1);  
Koff\_TSP1\_CD36 = params(52,1);  
Koff\_TSP1\_CD36\_p59 = params(53,1);  
Koff\_casp3\_PARP = params(54,1);

cytosol = 0.824;  
nucleus = 0.118;  
mc = 0.058;

### %% Fluxes

RF1 = Kon\_Fas\_FasL\*FasL\*Fas-koff\*DISC;  
RF2 = Kon\_DISC\_pro8\*DISC\*pro8-koff\*DISC\_pro8;  
RF3 = Kp43p41\*DISC\_pro8\*pro8;  
RF4 = Kon\_DISC\_FS\*FS\*DISC-koff\*DISC\_FS;  
RF5 = Kdeg\_casp8\*casp8;

RF6 = Kdeg\_casp3\*casp3;  
RF7 = Kon\_DISC\_FL\*DISC\*FL-koff\*DISC\_FL;  
RF8 = Kp43FLIP\*DISC\_pro8\*FL;  
RF9 = Kon\_DISC2\_FS\*DISC\_pro8\*FS-koff\*DISC\_pro8\_FS;  
RF10 = Kp43p41\*DISC\_FL\*pro8;

RF11 = Kp43FLIP\*DISC\_FL\*FL-koff\*DISC\_FL\_FL;  
RF12 = Kon\_DISC2\_FS\*DISC\_FL\*FS-koff\*DISC\_FL\_FS;  
RF13 = Kp43p41\*DISC\_FS\*pro8-koff\*DISC\_pro8\_FS;  
RF14 = Kp43FLIP\*DISC\_FS\*FL-koff\*DISC\_FL\_FS;  
RF15 = Kon\_DISC2\_FS\*DISC\_FS\*FS-koff\*DISC\_FS\_FS;

RF16 = K\_casp8\*p43p41\*p43p41;  
RF17 = Kc\_casp3\*casp8\*pro3;  
RF18 = Kr\_casp8\*casp3\*pro8;  
RF19 = Ka\_IKK\*p43\_FLIP\*IKK;  
RF20 = Kp\_NFkB\_IkB\*Nfkb\_IkB\*p43\_FLIP\_IKK\_a;

RF21 = Ka\_NFkB\*Nfkb\_IkB\_p;  
RF22 = Kdeg\_IKkKa\*p43\_FLIP\_IKK\_a;  
RF23 = Kdeg\_NFkBcyt\*Nfkb\_cyt;  
RF24 = Kon\_TSP1\_CD36\*TSP1\*CD36 - Koff\_TSP1\_CD36\*TSP1\_CD36;  
RF25 = Kon\_TSP1\_CD36\_p59\*TSP1\_CD36\*p59 - Koff\_TSP1\_CD36\_p59\*TSP1\_CD36\_p59;

RF26 = Kp\_p59\*TSP1\_CD36\_p59;  
RF27 = Kc\_casp8\*TSP1\_CD36\_pp59\*pro8;  
RF28 = K\_casp8\*p43p41\*p43p41;  
RF29 = Kc\_casp3\*casp8\*pro3;  
RF30 = Kon\_casp3\_MEKK1\*casp3\*MEKK1 - Koff\_casp3\_MEKK1\*casp3\_MEKK1;

RF31 = Kc\_MEKK1\*casp3\_MEKK1;  
RF32 = Kon\_cMEKK1\_p38\*cMEKK1\*p38cyt - Koff\_cMEKK1\_p38\*cMEKK1\_p38cyt;  
RF33 = Kp\_p38\*cMEKK1\_p38cyt;  
RF34 = Ktrsp\_cyt\_nuc\*p38cyt;  
RF35 = Ktrsp\_cyt\_nuc\*pp38cyt;

RF36 = Ktrsp\_cyt\_nuc\*pp38cyt\*cytosol/nucleus;  
RF37 = Ktrsp\_cyt\_nuc\*p38cyt\*cytosol/nucleus;  
RF38 = Kon\_pp38\_NFkB\*pp38nuc\*Nfkb\_nuc - Koff\_pp38\_NFkB\*pp38\_NFkB;  
RF39 = Kp\_NFkB\*pp38\_NFkB;  
RF40 = Vmax\_FasLm\*Nfkb\_p/(Km\_FasLm+Nfkb\_p);

RF41 = Kexp\_FasLm\*FasLm\_nuc;  
RF42 = Kexp\_FasLm\*FasLm\_nuc\*nucleus/cytosol;  
RF43 = Ksyn\_FasL\*FasLm\_cyt;

RF44 =  $K_{exp\_FasL} * FasL_{cyt}$ ;  
RF45 =  $K_{on\_casp3\_PARP} * casp3 * PARP - K_{off\_casp3\_PARP} * casp3\_PARP$ ;

RF46 =  $K_{i\_casp3\_XIAP} * casp3 * XIAP$ ;  
RF47 =  $K_{c\_PARP} * casp3\_PARP$ ;  
RF48 =  $K_{on\_dephos\_TSP1\_CD36\_pp59} * Ptase_{cyt} - K_{off\_dephos} * [pp59_{Ptase}]$ ;  
RF49 =  $K_{on\_dephos\_pp38cyt} * Ptase_{cyt} - K_{off\_dephos} * [pp38cyt_{Ptase}]$ ;  
RF50 =  $K_{on\_dephos\_pp38nuc} * Ptase_{nuc} - K_{off\_dephos} * [pp38nuc_{Ptase}]$ ;

RF51 =  $FasL_{syn\_factor} * DISC + K_{syn\_all}$ ;  
RF52 =  $FasL_{syn\_factor} * DISC + K_{syn\_all}$ ;  
RF53 =  $K_{trsp\_cyt\_nuc} * NFkB_{cyt}$ ;  
RF54 =  $K_{dephos\_pp59} * Ptase$ ;  
RF55 =  $K_{dephos\_pp38cyt} * Ptase$ ;

RF56 =  $K_{dephos\_pp38nuc} * Ptase$ ;  
RF57 =  $K_{syn\_all}$ ;  
RF58 =  $K_{syn\_all}$ ;  
RF59 =  $K_{syn\_all}$ ;  
RF60 =  $K_{syn\_all}$ ;

RF61 =  $K_{syn\_all}$ ;  
RF62 =  $K_{syn\_all}$ ;  
RF63 =  $K_{syn\_all}$ ;  
RF64 =  $K_{syn\_all}$ ;  
RF65 =  $K_{syn\_all}$ ;

RF66 =  $K_{syn\_all}$ ;  
RF67 =  $K_{syn\_all}$ ;  
RF68 =  $K_{syn\_Ptase}$ ;  
RF69 =  $K_{syn\_Ptase}$ ;  
RF70 =  $K_{deg\_Ptase} * Ptase_{nuc}$ ;

RF71 =  $K_{deg\_Ptase} * Ptase_{cyt}$ ;  
RF72 =  $K_{deg} * CD36$ ;  
RF73 =  $K_{deg} * TSP1\_CD36$ ;  
RF74 =  $K_{deg} * TSP1\_CD36\_p59$ ;  
RF75 =  $K_{deg} * TSP1\_CD36\_pp59$ ;

RF76 =  $K_{deg} * p43p41$ ;  
RF77 =  $K_{deg} * casp3\_MEKK1$ ;  
RF78 =  $K_{deg} * cMEKK1$ ;  
RF79 =  $K_{deg} * casp3\_PARP$ ;  
RF80 =  $K_{deg} * PARP$ ;

RF81 =  $K_{deg} * XIAP$ ;  
RF82 =  $K_{deg} * casp3\_u$ ;  
RF83 =  $K_{deg} * p38cyt$ ;  
RF84 =  $K_{deg} * cMEKK1\_p38cyt$ ;  
RF85 =  $K_{deg\_pp38cyt} * pp38cyt$ ;

RF86 =  $K_{deg} * pp38nuc$ ;  
RF87 =  $K_{deg} * p38nuc$ ;  
RF88 =  $K_{deg} * Fas$ ;  
RF89 =  $K_{deg} * DISC$ ;  
RF90 =  $K_{deg} * DISC\_FS$ ;

RF91 =  $K_{deg} * DISC\_FL$ ;  
RF92 =  $K_{deg} * DISC\_pro8$ ;  
RF93 =  $K_{deg} * p43\_FLIP$ ;  
RF94 =  $K_{deg} * DISC\_FL\_FL$ ;  
RF95 =  $K_{deg} * DISC\_FL\_FS$ ;

```

RF96 = Kdeg*DISC_FS_FS;
RF97 = Kdeg*IKK;
RF98 = Kdeg*Nfkb_Ikb;
RF99 = Kdeg*Nfkb_Ikb_p;
RF100 = Kdeg*pp59_Ptase;

RF101 = Kdeg*pp38cyt_Ptase;
RF102 = Kdeg*pp38nuc_Ptase;
RF103 = Kdeg*Nfkb_nuc;
RF104 = Kdeg*pp38_Nfkb;
RF105 = Kdeg*Nfkb_p;

RF106 = Ktrsp_cyt_nuc*Nfkb_cyt*cytosol/nucleus;
RF107 = Kdeg*DISC_pro8_FS;
RF108 = Kinter*CD36;
RF109 = Kinter*TSP1_CD36;
RF110 = Kinter*TSP1_CD36_p59;

RF111 = Kinter*TSP1_CD36_pp59;
RF112 = Kinsr;
RF113 = Kinter*Fas;
RF114 = Kinter*DISC;
RF115 = Kinter*DISC_FL;

RF116 = Kinter*DISC_FS;
RF117 = Kinter*DISC_pro8;
RF118 = Kinter*DISC_FL_FL;
RF119 = Kinter*DISC_FL_FS;
RF120 = Kinter*DISC_FS_FS;

RF121 = Kinter*DISC_pro8_FS;
RF122 = Kdeg*p59;
RF123 = Kdeg*pro8;
RF124 = Kdeg*pro3;
RF125 = Kdeg*FasL_cyt;

RF126 = Kdeg*MEKK1;
RF127 = Kdeg*FL;
RF128 = Kdeg*FS;

```

### %% ODEs

```

dydt(1,1) = -RF24;%TSP1
dydt(2,1) = -RF24 + RF57 - RF72-RF108 + RF112*0.0332;%CD36
dydt(3,1) = RF24 - RF25 - RF73-RF109;%TSP1_CD36
dydt(4,1) = -RF25 + RF58 - RF122;%p59
dydt(5,1) = RF25 - RF26 + RF54 - RF74-RF110;%TSP1_CD36_p59

dydt(6,1) = -RF2 - RF3 - RF10 - RF13 - RF18 - RF27 + RF52 - RF123;%pro8
dydt(7,1) = -RF5 + RF16 + RF27 + RF28;%casp8
dydt(8,1) = -RF17 - RF29 + RF51 - RF124;%pro3
dydt(9,1) = -RF6 + RF17 + RF29 - RF30 + RF31 - RF45 - RF46 + RF47;%casp3
dydt(10,1) = -RF32 - RF34 + RF55 + RF59 - RF83;%pp38cyt

dydt(11,1) = RF33 - RF35 - RF49 - RF85;%pp38cyt
dydt(12,1) = -RF48 - RF49 + RF54 + RF55 + RF68 - RF71;%Ptase_cyt
dydt(13,1) = RF49 - RF55 - RF101;%pp38cyt_Ptase
dydt(14,1) = RF48 - RF54 - RF100;%pp59_Ptase
dydt(15,1) = -RF46 + RF60 - RF81;%XIAP

dydt(16,1) = -RF45 + RF61 - RF80;%PARP
dydt(17,1) = RF45 - RF47 - RF79;%casp3_PARP
dydt(18,1) = RF47-Ksyn_all*cPARP;%cPARP

```

$dydt(19,1) = RF46 - RF82; \%casp3\_u$   
 $dydt(20,1) = RF43 - RF44 - RF125; \%FasL\_cyt$

$dydt(21,1) = RF42 - RF43; \%FasLm\_cyt$   
 $dydt(22,1) = -RF1 + RF62 - RF88 + RF112 * 0.0149 - RF113; \%Fas$   
 $dydt(23,1) = RF30 - RF31 - RF77; \%casp3\_MEKK1$   
 $dydt(24,1) = RF31 - RF32 + RF33 - RF78; \%cMEKK1$   
 $dydt(25,1) = -RF30 + RF63 - RF126; \%MEKK1$

$dydt(26,1) = RF32 - RF33 - RF84; \%cMEKK1\_p38cyt$   
 $dydt(27,1) = -RF7 - RF8 - RF11 - RF14 + RF64 - RF127; \%FL$   
 $dydt(28,1) = RF1 - RF2 - RF4 - RF7 - RF89 - RF114; \%DISC$   
 $dydt(29,1) = -RF1 + RF44; \%FasL$   
 $dydt(30,1) = RF2 - RF3 - RF8 - RF9 - RF92 - RF117; \%DISC\_pro8$

$dydt(31,1) = RF7 - RF10 - RF11 - RF12 - RF91 - RF115; \%DISC\_FL$   
 $dydt(32,1) = -RF4 - RF9 - RF12 - RF15 + RF65 - RF128; \%FS$   
 $dydt(33,1) = RF4 - RF13 - RF14 - RF15 - RF90 - RF116; \%DISC\_FS$   
 $dydt(34,1) = 2 * RF3 - 2 * RF16 + RF18 - 2 * RF28 - RF76; \%p43p41$   
 $dydt(35,1) = RF8 + RF10 - RF19 - RF93; \%p43\_FLIP$

$dydt(36,1) = RF9 + RF13 - RF107 - RF121; \%DISC\_pro8\_FS$   
 $dydt(37,1) = RF11 - RF94 - RF118; \%DISC\_FL\_FL$   
 $dydt(38,1) = RF12 + RF14 - RF95 - RF119; \%DISC\_FL\_FS$   
 $dydt(39,1) = RF15 - RF96 - RF120; \%DISC\_FS\_FS$   
 $dydt(40,1) = -RF19 + RF66 - RF97; \%IKK$

$dydt(41,1) = RF19 - RF22; \%p43\_FLIP\_IKK\_a$   
 $dydt(42,1) = -RF20 + RF67 - RF98; \%NFkB\_IkB$   
 $dydt(43,1) = RF20 - RF21 - RF99; \%NFkB\_IkB\_p$   
 $dydt(44,1) = RF21 - RF23 - RF53; \%NFkB\_cyt$   
 $dydt(45,1) = RF26 - RF48 - RF75 - RF111; \%TSP1\_CD36\_pp59$

$dydt(46,1) = RF36 - RF38 + RF39 - RF50 - RF86; \%pp38nuc$   
 $dydt(47,1) = RF37 + RF56 - RF87; \%p38nuc$   
 $dydt(48,1) = -RF50 + RF56 + RF69 - RF70; \%Ptase\_nuc$   
 $dydt(49,1) = RF50 - RF56 - RF102; \%pp38nuc\_Ptase$   
 $dydt(50,1) = RF40 - RF41; \%FasLm\_nuc$

$dydt(51,1) = -RF38 - RF103 + RF106; \%NFkB\_nuc$   
 $dydt(52,1) = RF38 - RF39 - RF104; \%pp38\_NFkB$   
 $dydt(53,1) = RF39 - RF105; \%NFkB\_p$

%% parameter values

type = 'weighted';

params = zeros(54,1);

params(1,1) = 30;%Kon\_dephos

params(2,1) = 1;%Kdephos

params(3,1) = 60;%Ki\_casp3\_XIAP

params(4,1) = 0.1;%Ktrsp\_cyt\_nuc

params(5,1) = 0.003;%Kinter

params(6,1) = 5;%Vmax\_FasLm

params(7,1) = 0.5;%Km\_FasLm

params(8,1) = 0.6;%Kexp\_FasLm

params(9,1) = 0.5;%Ksyn\_FasL

params(10,1) = 0.6;%Kexp\_FasL

params(11,1) = 30;%Kon\_Fas\_FasL

params(12,1) = 30;%Kon\_DISC\_pro8

params(13,1) = 0.0001; %Ksyn\_all

params(14,1) = 0.001;%Kdeg

params(15,1) = 30;%Kon\_casp3\_MEKK1

params(16,1) = 60;%Kp\_p38

params(17,1) = 60;%Kc\_MEKK1

params(18,1) = 30; %Kon\_cMEKK1\_p38

params(19,1) = 20;%FasLsyn\_factor

params(20,1) = 669.33; %Kon\_DISC\_FL

params(21,1) = 0.01; %Kon\_DISC\_FS

params(22,1) = 0.59466; %Kp43p41

params(23,1) = 1000;%Kp43FLIP

params(24,1) = 887.51;%Kon\_DISC2\_FS

params(25,1) = 0.80444;%K\_casp8

params(26,1) = 2.2498;%Kc\_casp3

params(27,1) = 120.53;%Kr\_casp8

params(28,1) = 0.72043;%Ka\_IKK

params(29,1) = 358.82;%Kp\_NFkBikB

params(30,1) = 3.6842;%Ka\_NFkB

params(31,1) = 0.022299;%Kp\_p38

params(32,1) = 0.006418;%Kdeg\_NFkBcyt

params(33,1) = 0.0289;%Kdeg\_casp8

params(34,1) = 0.15029;%Kdeg\_casp3

params(35,1) = 30;%Kon\_pp38\_NFkB v4

params(36,1) = 0.001; %Kdeg\_pp38cyt

params(37,1) = 30;%Kon\_TSP1\_CD36

params(38,1) = 30;%Kon\_TSP1\_CD36\_p59

params(39,1) = 60;%Kp\_p59

params(40,1) = 60;%Kp\_NFkB

params(41,1) = 30;%Kon\_casp3\_PARP

params(42,1) = 60; %Kc\_PARP

params(43,1) = 0.0001;%Ksyn\_Ptase

params(44,1) = 0.001;%Kdeg\_Ptase

params(45,1) = 60;%Kc\_casp8

params(46,1) = 0.03;%Kinser

params(47,1) = 1.2e-2;%koff

params(48,1) = 1.2e-2;%Koff\_dephos

params(49,1) = 1.2e-2;%Koff\_casp3\_MEKK1

params(50,1)=1.2e-2 ;%Koff\_cMEKK1\_p38

params(51,1)= 1.2e-2;%Koff\_pp38\_NFkB

params(52,1)=1.2e-2 ;%Koff\_TSP1\_CD36

params(53,1)= 1.2e-2;%Koff\_TSP1\_CD36\_p59

params(54,1)= 1.2e-2;%Koff\_casp3\_PARP

cytosol = 0.824;

nucleus = 0.118;

mc = 0.058;

%% Initial Concentrations

y(1)= 0.000; %TSP1

y(2) = 0.0332; %CD36

y(3) = 0;%TSP1\_CD36

y(4) = 0.34;%p59

y(5) = 0;%TSP1\_CD36\_p59

y(6)= 0.0647;%pro8

y(7)= 0;%casp8

y(8) = 0.00144;%pro3

y(9) = 0;%casp3

y(10) = 0.15;%p38cyt

y(11) = 0;%pp38cyt

y(12) = 0.017;%Ptase\_cyt

y(13) = 0; %pp38cyt\_Ptase

y(14) = 0;%pp59\_Ptase

y(15) = 0.17;%XIAP

y(16) = 1.7;%PARP

y(17) = 0; %casp3\_PARP

y(18) = 0;%cPARP

y(19) = 0;%casp3\_u

y(20) = 0;%FasL\_cyt

y(21) = 0; %FasLm\_cyt

y(22) = 0.0149; %Fas

y(23) = 0; %casp3\_MEKK1

y(24) = 0; % cMEKK1

y(25) = 0.025; %MEKK1

y(26) = 0; %cMEKK1\_p38cyt

y(27) = 0.0073986; % FL

y(28) = 0; %DISC

y(29) = 0;%FasL

y(30) = 0;%DISC\_pro8

y(31) = 0;%DISC\_FL

y(32) = 0.0050839;%FS

y(33) = 0;%DISC\_FS

y(34) = 0;%p43p41

y(35) = 0;%p43\_FLIP v4

y(36) = 0;%DISC\_pro8\_FS

y(37) = 0;% DISC\_FL\_FL

y(38) = 0; %DISC\_FL\_FS

y(39) = 0;%DISC\_FS\_FS

y(40) = 0.0057728;%IKK

y(41) = 0;%p43\_FLIP\_IKK\_a

y(42) = 0.0047395;%NFkB\_IkB

y(43) = 0; %NFkB\_IkB\_p



y(44) = 0.0008; %NFkB\_cyt  
y(45) = 0; %TSP1\_CD36\_pp59

y(46) = 0; %pp38nuc  
y(47) = 0; %p38nuc  
y(48) = 0.017; %Ptase\_nuc  
y(49) = 0; %pp38nuc\_Ptase  
y(50) = 0; %FasLm\_nuc

y(51) = 0; %NFkB\_nuc  
y(52) = 0; %pp38\_NFkB  
y(53) = 0; %NFkB\_p
