# Supplementary material for: Predictive model identifies strategies to enhance TSP1-mediated apoptosis signaling
Source: PubMed Central journal article supplement (PMC5735807; doi:10.1186/s12964-017-0207-9), 2017-12-19
Supplement: 12964_2017_207_MOESM3_ESM.pdf [file 12964_2017_207_MOESM3_ESM.pdf]

## Supplemental Figures:

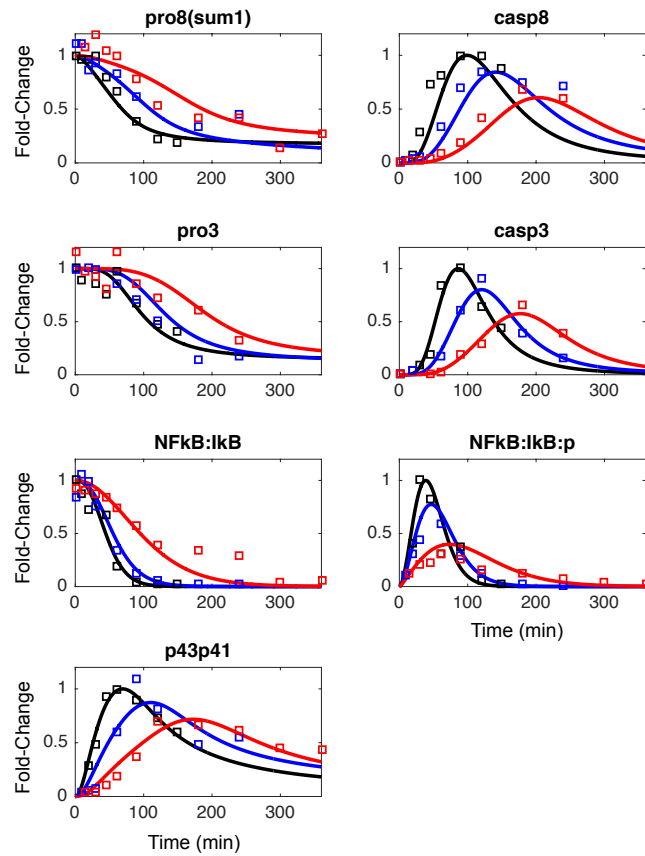

**Figure S1. Comparison of minimal model of FasL signaling to experimental data.** We implemented a minimal based on the work of Neumann *et al.* We included reversible reactions to mirror how other binding interactions are implemented in our full model. Predictions from the minimal model (lines) matches the original data (squares). FasL concentration used in model simulations: 1500ng/ml (black), 500ng/ml (blue), and 250ng/ml (red).

Figure S2

A

Caspase cascade

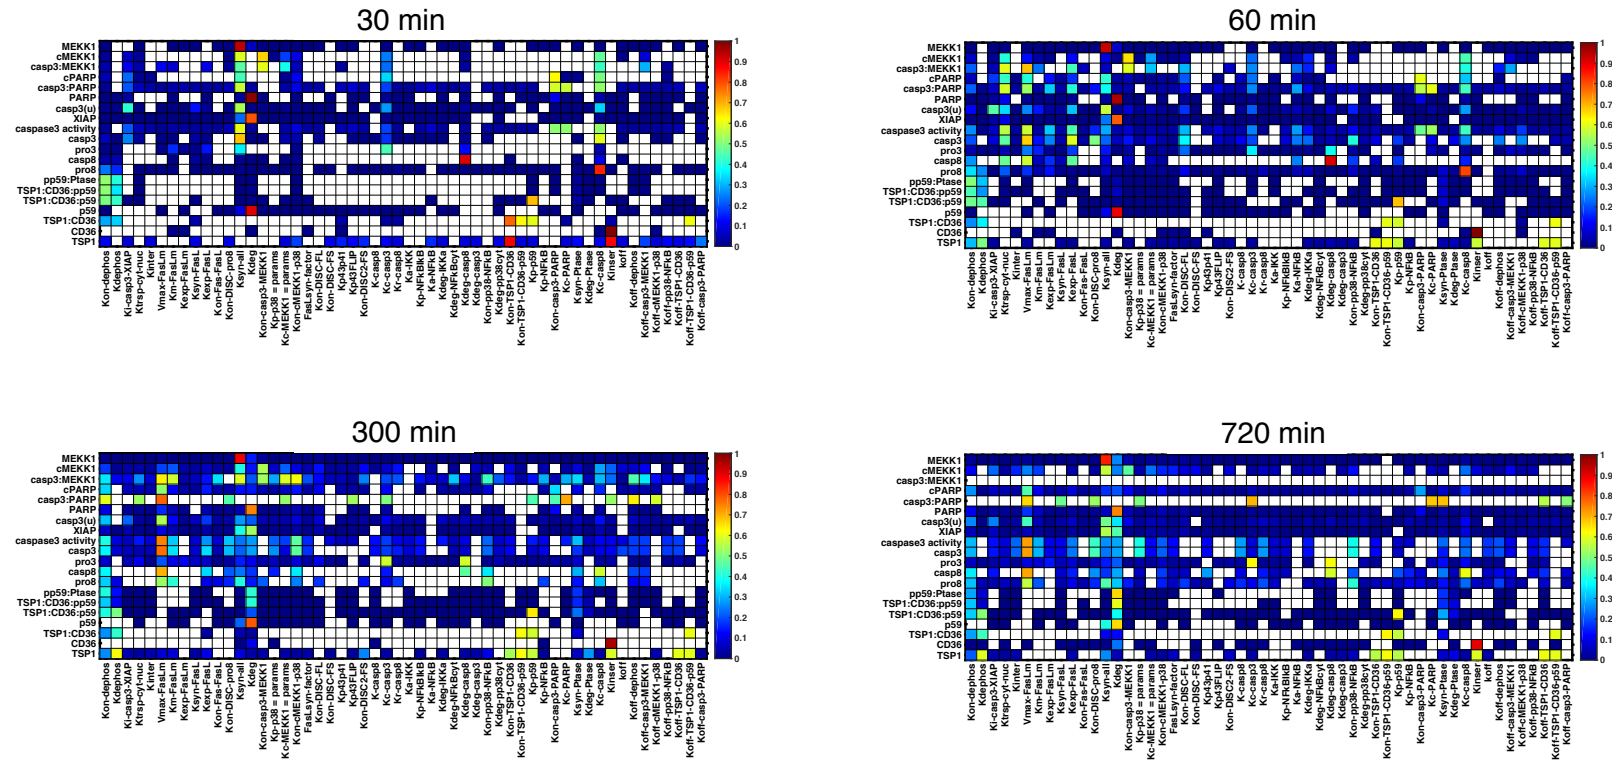





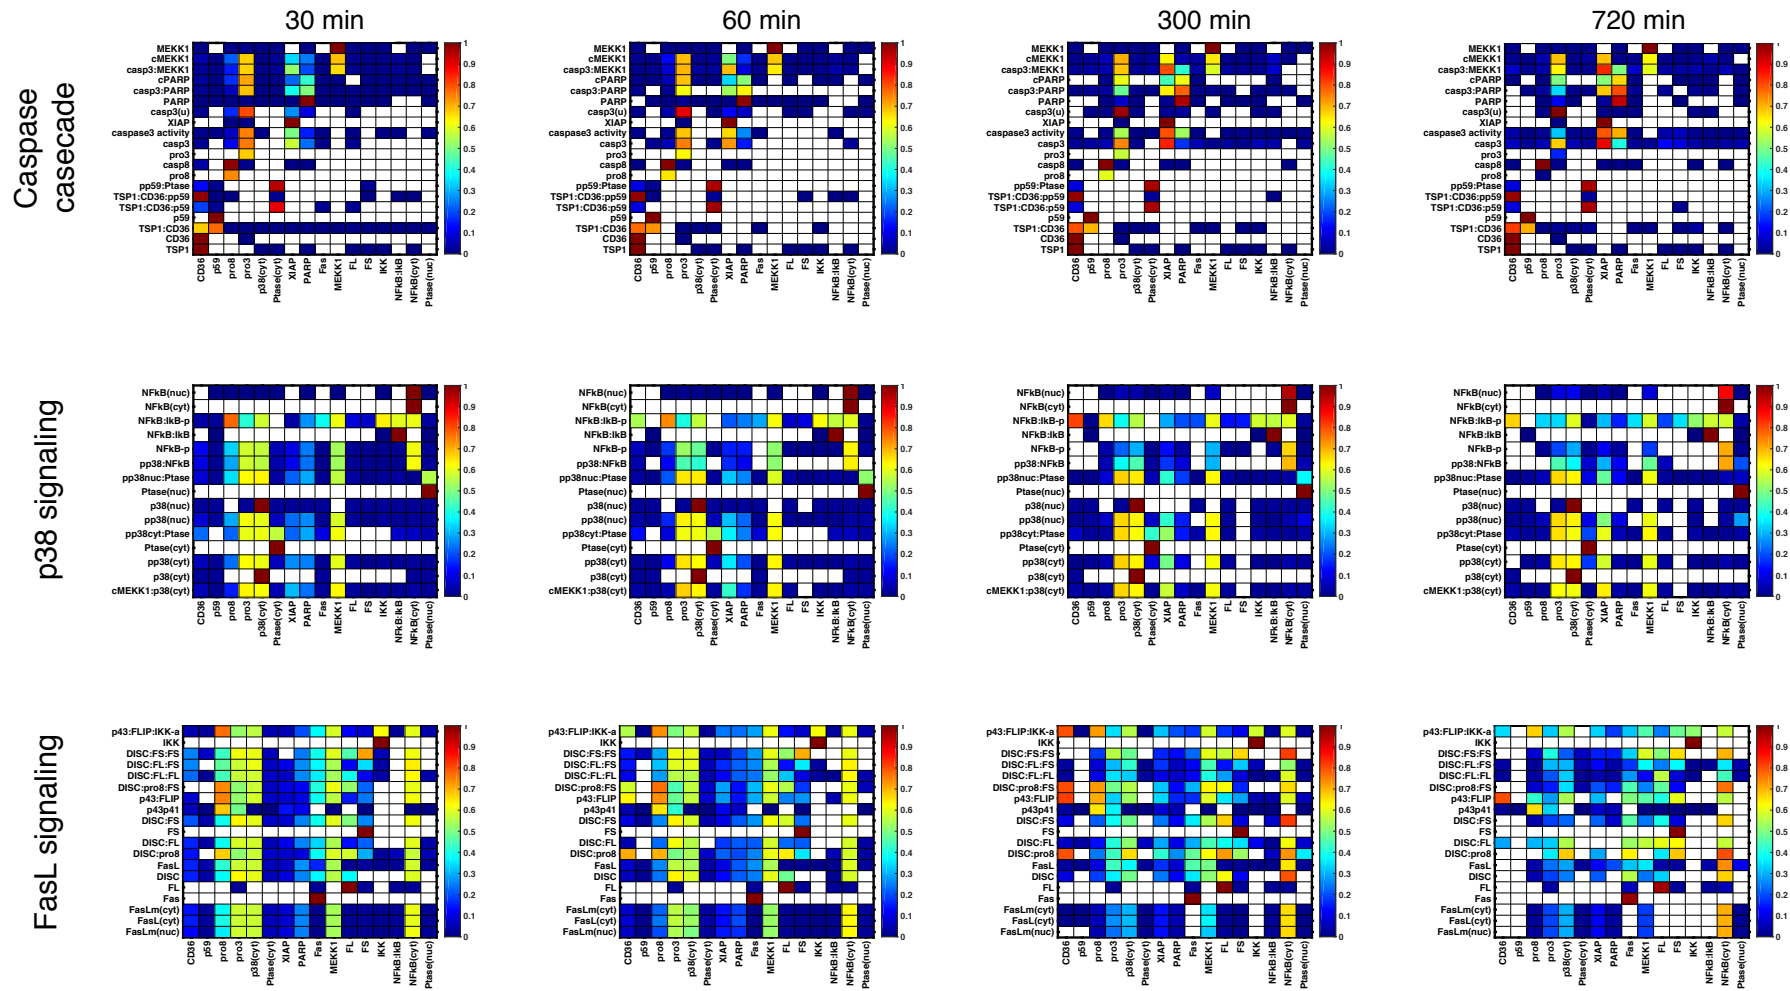

**Figure S3. Global sensitivity analysis of non-zero initial concentrations.** We performed eFAST sensitivity analysis to identify which initial concentrations most significantly influence the cPARP concentration predicted by the model for different simulated time points. The total sensitivity index is shown for each species with a non-zero initial condition. x-axis: non-zero initial concentrations (inputs); y-axis: model species (outputs). Plots are arranged by upstream (“Caspase cascade”), intermediate (“p38 signaling”), and downstream signaling (“FasL signaling”).

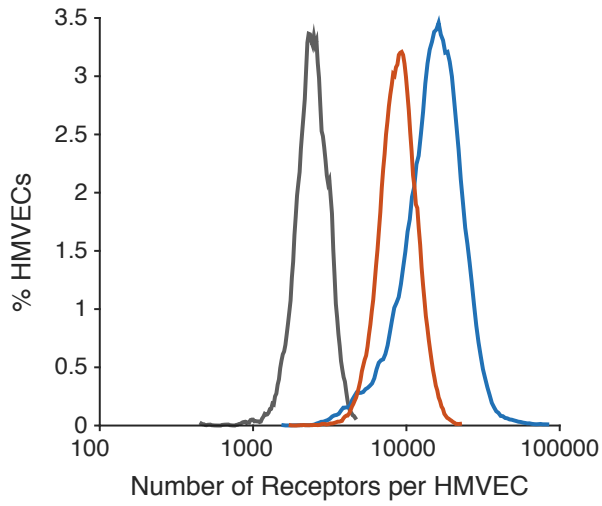

**Figure S4. Receptor number distributions of CD36 and Fas.** Histogram showing distributions of CD36 receptor (blue) and Fas receptor (red) on HMVECs. Two representative samples of each receptor quantification measurement are shown (a total of 12,286 cells for CD36 and 11,013 cells for Fas). Grey: unstained control (3,840 cells).

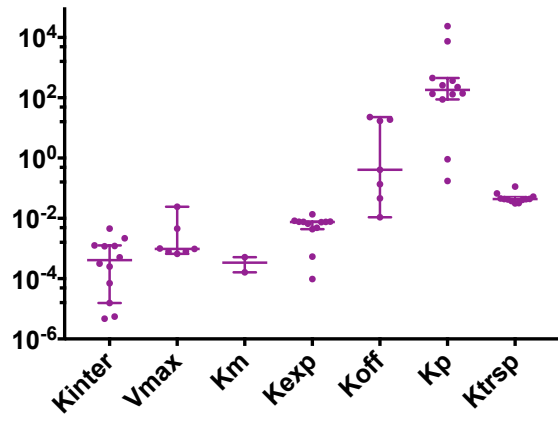

Figure S5. Distribution of estimated parameter values.

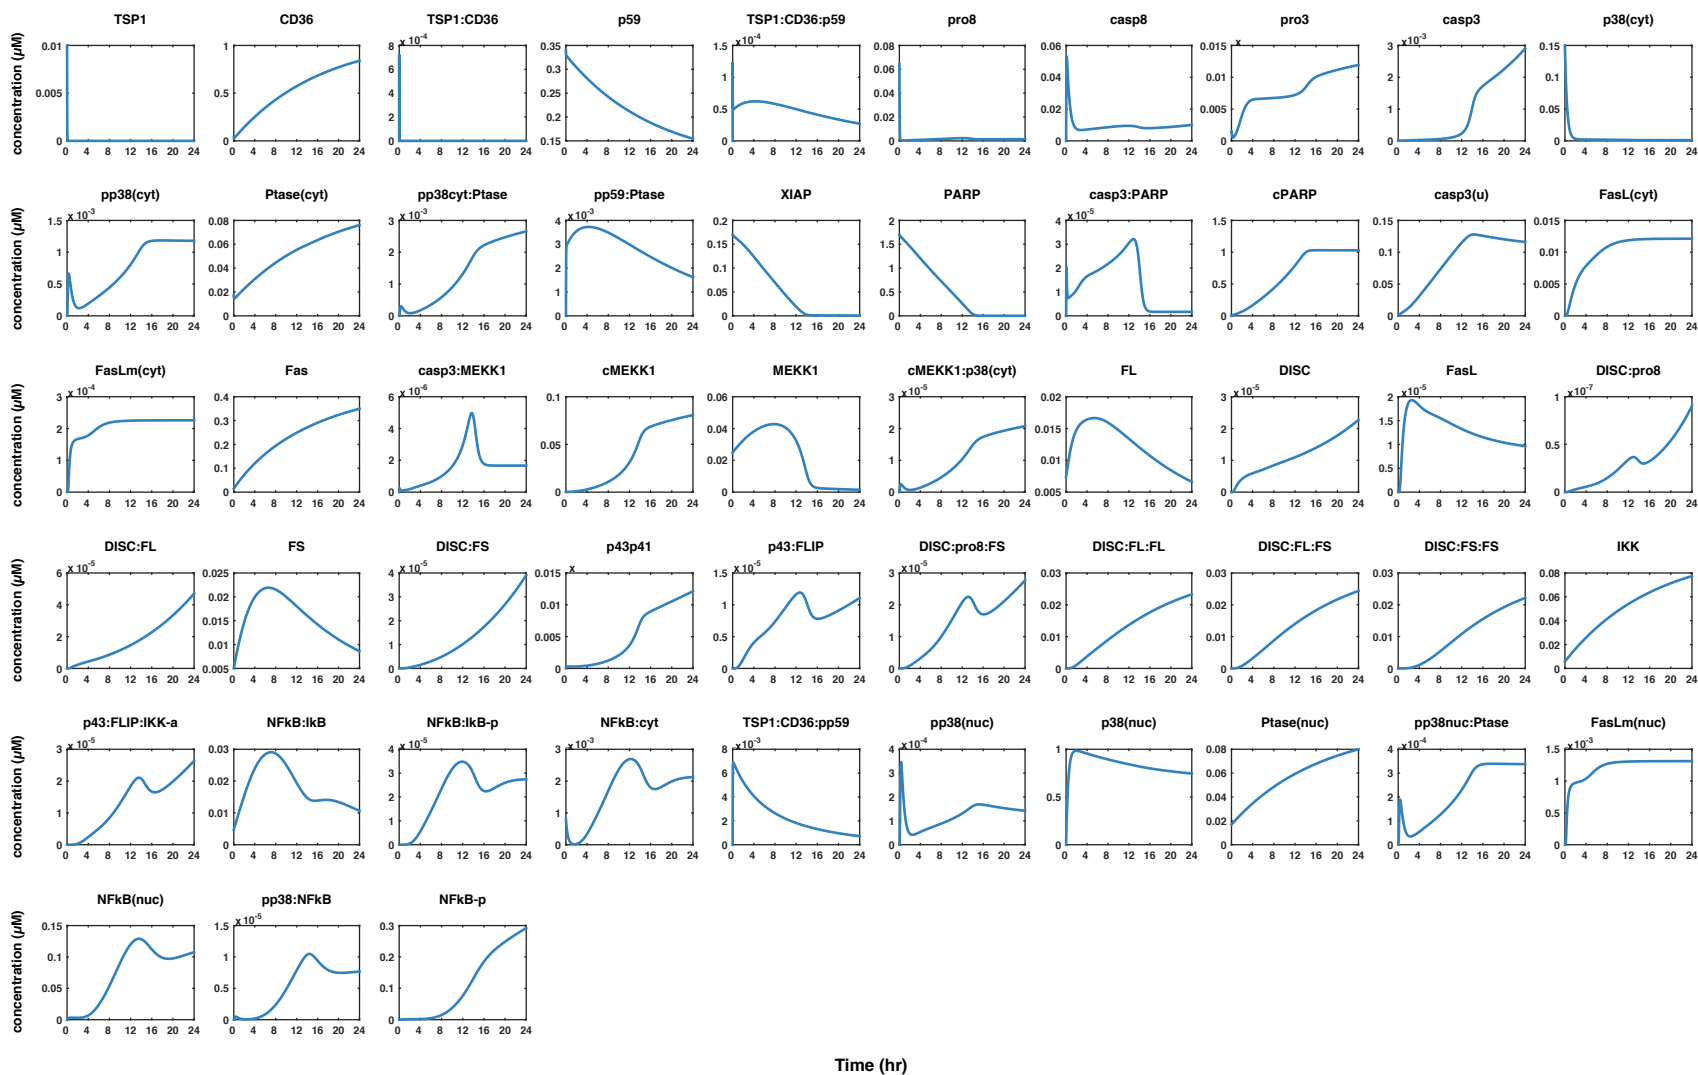

**Figure S6. Baseline model simulated dynamics of all species with TSP1 stimulation.** The concentrations of all 53 species in the modeled network with 10 nM TSP1 stimulation were simulated with the best set of parameter values.



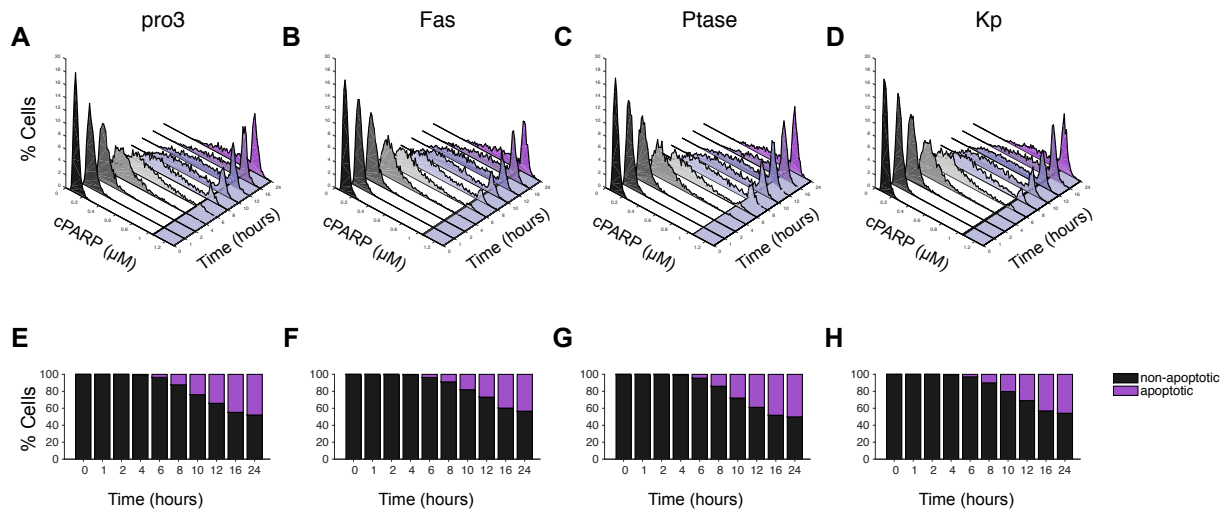

**Figure S7. Population-level response to TSP1 stimulation.** (A)-(D): Histogram showing the percentage of the 2,000 cells with a given cPARP concentration, in response to 10 nM TSP1 stimulation with A) procaspase-3 overexpression; B) Fas overexpression; C) phosphatase inhibition; and D) increasing kinase activity. A different color is assigned to each time point, and shading on the x-y plane indicates the threshold cPARP concentration for classifying cells as apoptotic (1.05 nM). (E)-(H): The predicted percentage of non-apoptotic (black) and apoptotic (purple) cells in response to 10 nM TSP1 stimulation with E) procaspase-3 overexpression; F) Fas overexpression; G) phosphatase inhibition; and H) increasing kinase activity.

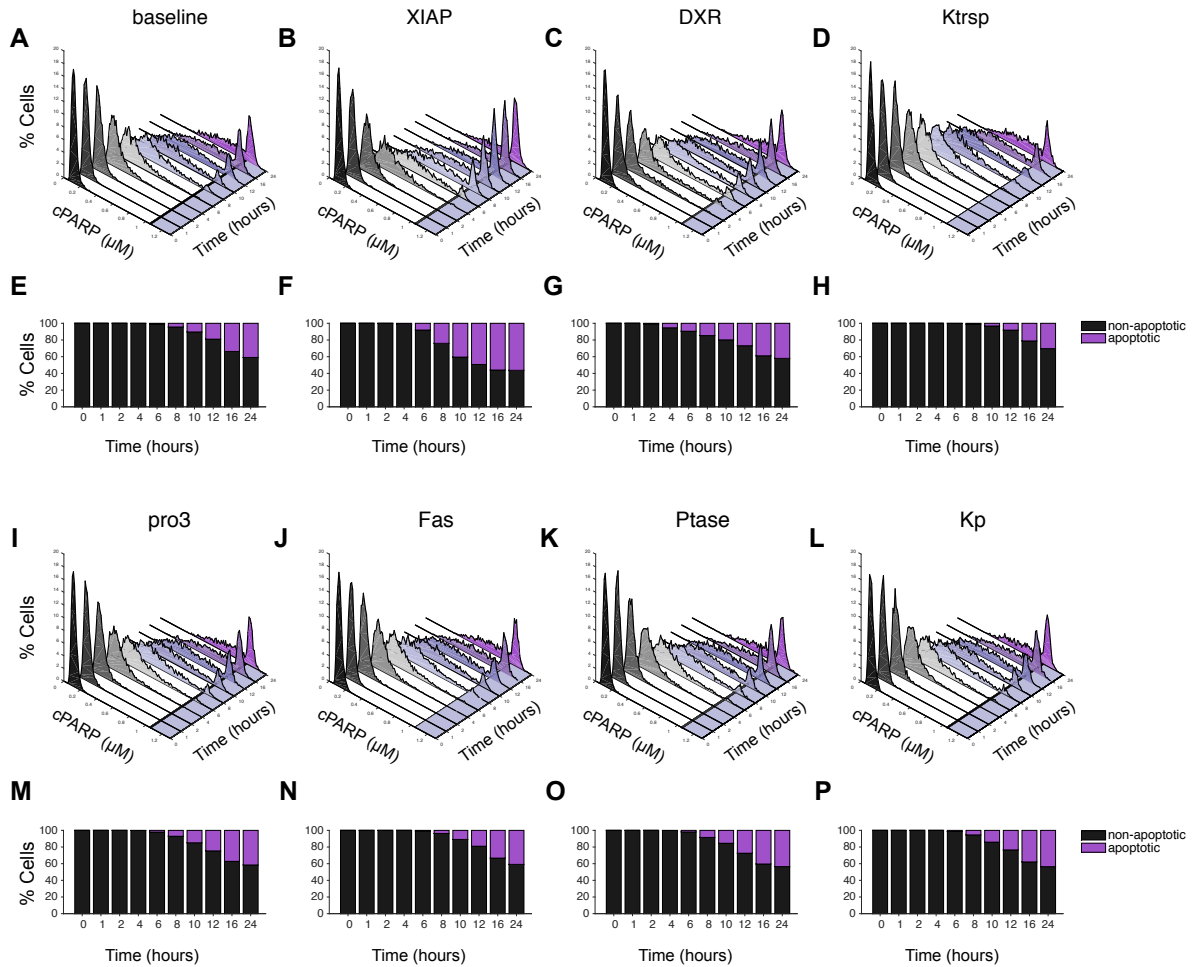

**Figure S8. Population-level response to 0.1 nM TSP1 stimulation.** (A)-(D): Histogram showing the percentage of the 2,000 cells in response to 0.1 nM TSP1 stimulation. A) Baseline model; B) XIAP downregulation; C) DXR treatment; and D) Increased nuclear translocation rate. A different color is assigned to each time point. (E)-(H): The predicted percentage of non-apoptotic (black) and apoptotic (orange) cells in response to 0.1 nM TSP1 stimulation. E) Baseline model; F) XIAP downregulation; G) DXR treatment; and H) Increased nuclear translocation rate. (I)-(L): Histogram showing the percentage of the 2,000 cells in response to 0.1 nM TSP1 stimulation with I) procaspase-3 overexpression; J) Fas overexpression; K) phosphatase inhibition; and L) increasing kinase activity. (M)-(P): The predicted percentage of non-apoptotic (black) and apoptotic (orange) cells in response to 0.1 nM TSP1 stimulation with M) procaspase-3 overexpression; N) Fas overexpression; O) phosphatase inhibition; and P) increasing kinase activity. In (A)-(D) and (I)-(L), shading on the x-y plane indicates the threshold cPARP concentration for classifying cells as apoptotic (1.05 nM).
